# Supplementary material
Source: PubMed Central journal article supplement (PMC2583329)
Supplement: NIHMS72653-supplement-BAT_Muscle_SI.pdf [file NIHMS72653-supplement-BAT_Muscle_SI.pdf]

SUPPLEMENTAL FIGURES AND TABLES

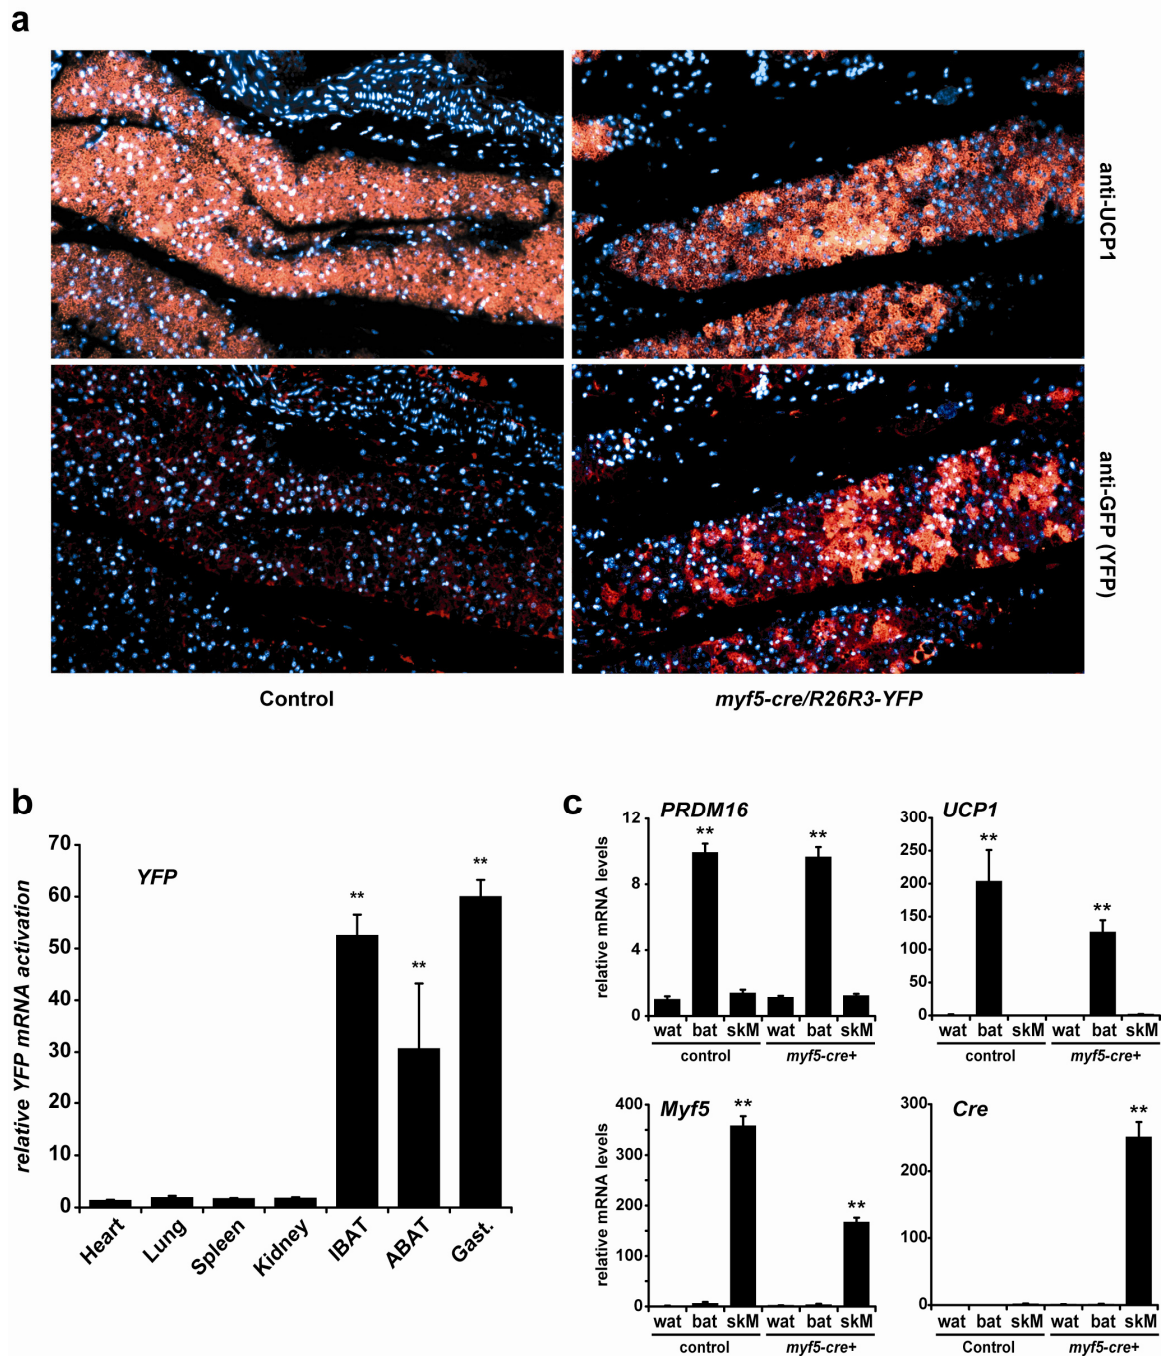

**Fig. S1. *myf5*-expressing cells give rise to brown fat depots and skeletal muscle**

(a) Perirenal BAT from control (*cre* negative) and *myf5-cre:R26R3-YFP* mice were analyzed by immunohistochemistry to detect YFP (anti-GFP) and UCP1 protein. (b) Real-time PCR analysis of *YFP* gene activation in: heart, lung, spleen, kidney, interscapular BAT (IBAT), axial BAT (ABAT) and gastrocnemius muscle (Gast.) from *myf5-cre:R26R3-YFP* mice (c) Real time PCR analysis of *PRDM16*, *UCP1*, *myf5* and *cre* recombinase expression in WAT, BAT and skeletal muscle (skM) (n=4-6 mice/group; error bars represent  $\pm$  SEM). \*\*p<0.01.

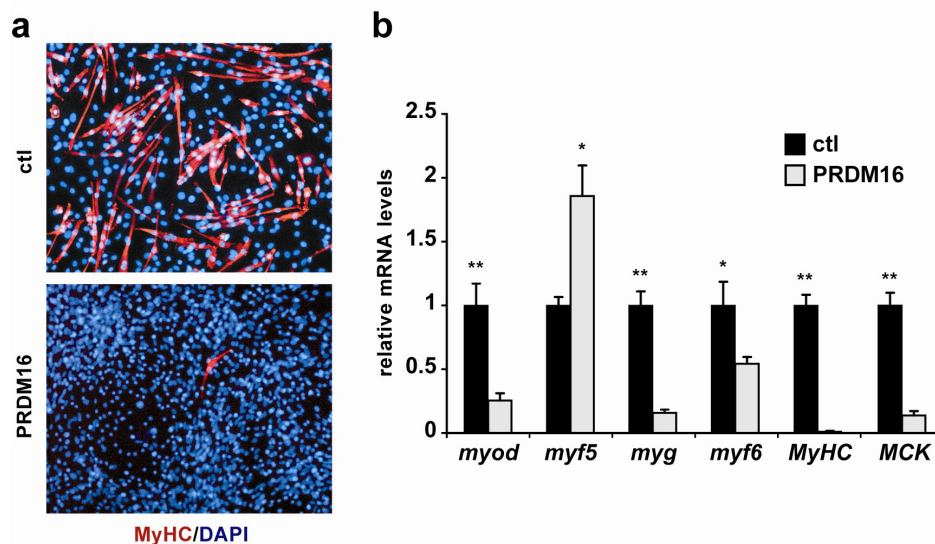

**Fig. S2. PRDM16 expression blocks myogenic differentiation**

(a) C2C12 myoblast cultures expressing retroviral PRDM16 or vector control (ctl) were induced to undergo muscle differentiation in 2% horse serum and analyzed by immunocytochemistry for expression of skeletal Myosin Heavy Chain (MyHC) protein. (b) Real-time PCR analysis of skeletal muscle-specific genes (n=3; error bars represent  $\pm$  SD; \*p<0.05 \*\*p<0.01).

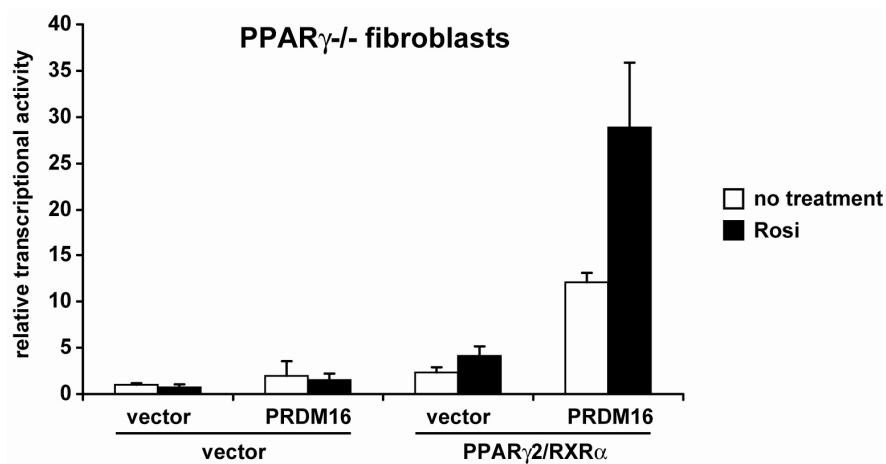

**Fig. S3. PRDM16 coactivates exogenous PPAR $\gamma$  in PPAR $\gamma$ -deficient cells**

Transcriptional activity of a PPAR-driven reporter gene in response to PRDM16 or vector expression in PPAR $\gamma$ -/- cells with or without exogenous PPAR $\gamma$ /RXR $\alpha$  (+/- 1  $\mu$ M rosiglitazone) (n=3; error bars represent  $\pm$  SD; \*\*p<0.05).

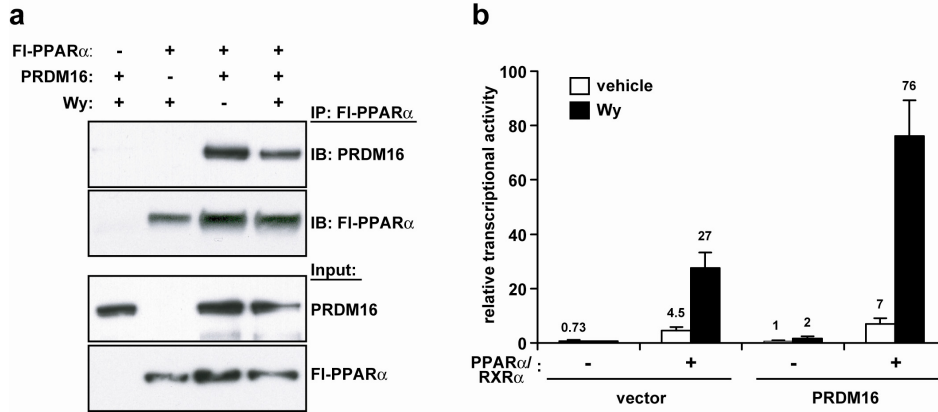

**Fig. S4. PRDM16 binds and activates the transcriptional function of PPAR $\alpha$**

(a) Flag-PPAR $\alpha$  was immunoprecipitated from COS-7 cells expressing exogenous PRDM16 and/or Flag-PPAR $\alpha$  followed by western blot analysis to detect PRDM16. The interaction was examined in the presence or absence of 1  $\mu$ M of a specific PPAR $\alpha$  ligand, WY-14643 (Wy). (b) Transcriptional activity of a PPAR-driven reporter gene (3x DR1) in response to PPAR $\alpha$ /RXR $\alpha$  and PRDM16 or vector expression in COS-7 cells (+/- 1  $\mu$ M Wy). (n=3; error bars represent  $\pm$  SD; \*\*p<0.05).

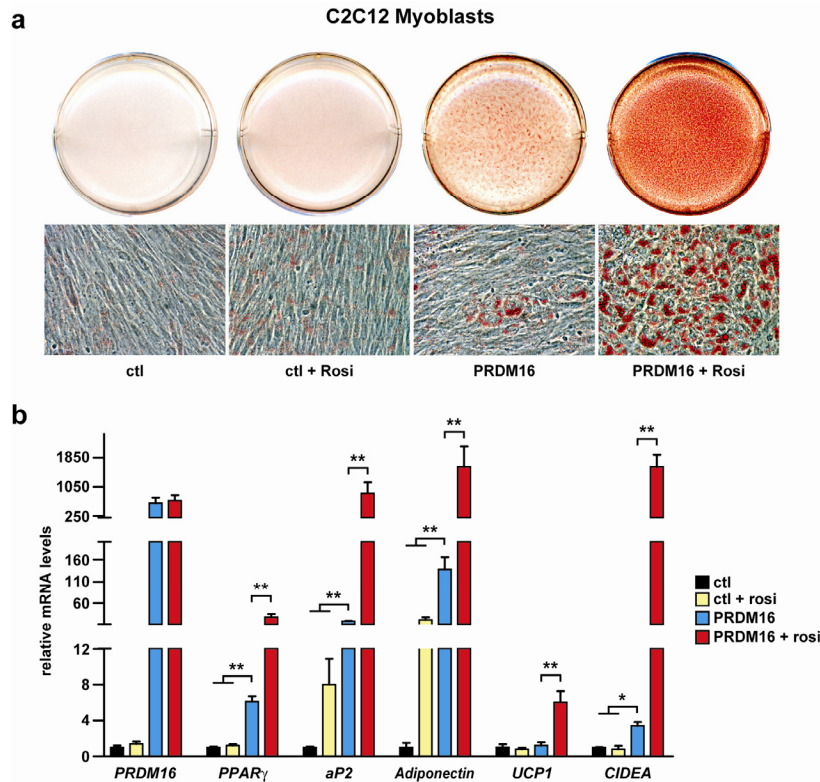

**Fig. S5. PPAR $\gamma$  activation is required for the adipogenic action of PRDM16**

(a) Oil-Red-O staining of C2C12 myoblast cultures expressing retroviral PRDM16 or vector control (ctl) 6 days after inducing adipocyte differentiation in the presence or absence of 1  $\mu$ M of the PPAR $\gamma$ -specific agonist, rosiglitazone. (b) Real-time PCR analysis of: *PRDM16*; adipocyte markers (*PPAR $\gamma$* , *aP2*, *Adiponectin*); and BAT-selective genes (*CIDEA*, *UCP1*) (n=3; error bars represent  $\pm$  SD; \*\*p<0.05).

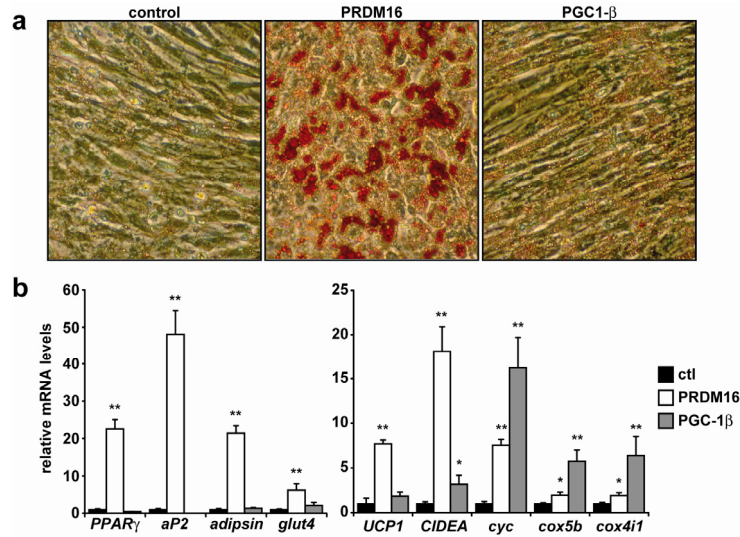

**Fig. S6. PGC-1 $\beta$  expression does not stimulate adipogenesis in myoblasts**

(a) Oil-Red-O staining of C2C12 myoblast cultures transduced with retroviral PRDM16, PGC-1 $\beta$  or vector control 7 days after inducing adipocyte differentiation. (b) Real-time PCR analysis of: adipocyte markers (left), BAT genes (*UCP1*, *CIDEA*); and mitochondrial genes (*cyc*, *cox5b*, *cox4i1*) (n=3, error bars are  $\pm$  SD; \*p<0.05 \*\*p<0.01).

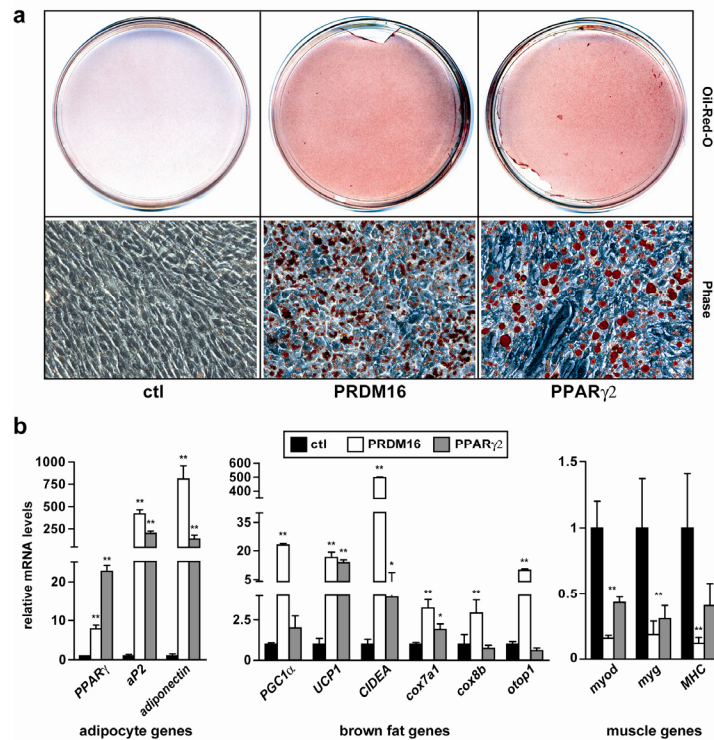

**Fig. S7. PPAR $\gamma$  alone drives adipogenesis but does not induce the brown fat cell gene program in C2C12 myoblasts**

(a) Oil-Red-O staining of C2C12 myoblast cultures expressing retroviral PRDM16, PPAR $\gamma$ 2 or empty vector control (ctl) 7 days after induction of adipocyte differentiation. (b) Real-time PCR analysis of: adipocyte markers; BAT-selective genes; and skeletal muscle-specific genes (n=3 per group, error bars represent  $\pm$  SD; \*p<0.05 \*\*p<0.01).

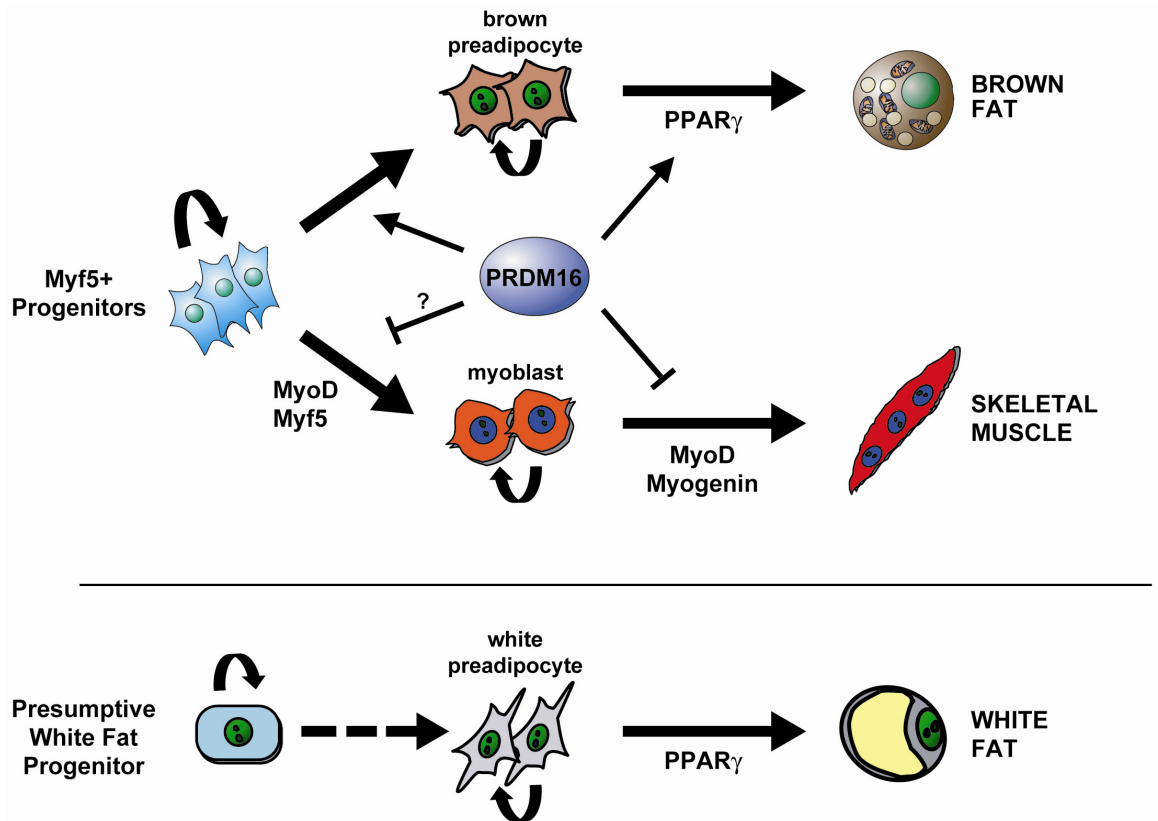

**Fig. S8. Model of PRDM16 function in the specification of brown fat fate**

Lineage tracing studies reveal that *myf5*-expressing precursors give rise to skeletal muscle and BAT but not WAT or any other tissues examined. PRDM16 expression in myoblasts induces BAT development and represses skeletal muscle differentiation. PRDM16 stimulates brown adipogenesis in myoblasts, at least in part, via binding and coactivating PPAR $\gamma$ . Together, these studies suggest that PRDM16 expression in bipotent muscle/brown fat progenitor cells determines brown fat identity. The mechanisms by which PRDM16 promotes brown fat determination and represses the muscle lineage in this upstream progenitor cell remain to be defined.

**Table S1. Proteins identified by MALDI-TOF-MS/MS**

| <b>MW</b> | <b>Protein Identification</b>                                                                                                                                                                                                                                                                                                                                                                                               |
|-----------|-----------------------------------------------------------------------------------------------------------------------------------------------------------------------------------------------------------------------------------------------------------------------------------------------------------------------------------------------------------------------------------------------------------------------------|
| ~30 kda   | splicing factor, arginine/serine-rich 1 isoform 2 (~22 kDa); NCBI# 26383576; Sequence: I Y V G N L P D I R                                                                                                                                                                                                                                                                                                                  |
| ~35 kda   | ribosomal protein L6 (~33 kDa); NCBI# 84662736; Sequence: A V P Q L Q G Y L R                                                                                                                                                                                                                                                                                                                                               |
| ~42 kda   | A: $\beta$ -actin (~42 kDa); NCBI# 74190672<br>B: tropomodulin 3 (~40 kDa); NCBI# 8394460 ; Sequence: F G Y Q F T Q Q G P R                                                                                                                                                                                                                                                                                                 |
| ~48 kda   | A: $\beta$ -actin (~42 kDa); NCBI# 74190672<br>B: C-terminal binding protein 1 (~48 kDa); NCBI# 7304989<br>C: C-terminal binding protein 2 (~46 kDa); NCBI# 2909779<br>Sequence: I R G E T L G L I G F G R;<br>D: heterogeneous nuclear ribonucleoprotein F (~46 kDa); NCBI# 19527048<br>Sequence: H S G P N S A D S A N D G F V R                                                                                          |
| ~55 kda   | A: Trim35 (~55kda); NCBI # 32425788; Sequence: I R D E F D K L R<br>B: polymerase I and transcript release factor (~43kda); NCBI # 6679567<br>Sequence: K S F T P D H V VYAR<br>C: heterogeneous nuclear ribonucleoprotein H2 (~49 kDa); NCBI# 9845253<br>Sequence: H T G P N S P D T A N D G F V R<br>D: immunoglobulin heavy chain constant region (~36 kDa); NCBI# 14091948<br>Sequence: A P Q V Y T I P P P K E Q M A K |
| ~65 kda   | A: DEAD box polypeptide 5 (~69 kDa); NCBI# 120538559<br><b>B: PPAR<math>\gamma</math> (~57kDa); NCBI # 18255316</b><br>Sequence: H I T P L Q E Q S K                                                                                                                                                                                                                                                                        |
| ~70 kda   | A: HSP 70, protein 5 (~72 kDa); NCBI# 31981722<br>B: HSP 8 (~71kDa); NCBI# 42542422<br>C: HSP 9A (~74 kDa); NCBI# 6754256<br>D: heterogeneous nuclear ribonucleoprotein M (~78 kDa); NCBI# 21313308                                                                                                                                                                                                                         |
| ~85 kda   | gelsolin (~86kDa); NCBI# 28916693                                                                                                                                                                                                                                                                                                                                                                                           |
| ~100 kda  | A: myosin IC isoform b (~118kDa); NCBI# 6678986<br>B: major vault protein (MVP); NCBI # 17433104<br>Sequence: V P H N A A V Q V Y D Y R;<br>C: gelsolin (~86kDa); NCBI# 28916693                                                                                                                                                                                                                                            |
| ~125 kda  | pyruvate carboxylase (~130 kDa); NCBI# 6679237                                                                                                                                                                                                                                                                                                                                                                              |
| ~150 kda  | PRDM16 protein (~130 kDa); NCBI# 37590584                                                                                                                                                                                                                                                                                                                                                                                   |
| ~175 kDa  | PRDM16 protein (~130 kDa); NCBI# 37590584                                                                                                                                                                                                                                                                                                                                                                                   |
| ~200 kda  | myosin, heavy polypeptide 9, non-muscle (~226 kDa); NCBI# 114326446                                                                                                                                                                                                                                                                                                                                                         |
| ~300 kDa  | A: $\alpha$ -spectrin (~270kDa); NCBI # 115496850<br>B: $\beta$ -spectrin (~270kDa); NCBI # 117938332                                                                                                                                                                                                                                                                                                                       |

Note: All samples contained peptides derived from PRDM16; this information was removed before identifications were made for each protein sample.

**Table S2. Primers used for real-time PCR analysis**

| <b>Gene</b>                     | <b>Forward primer (5' - 3')</b> | <b>Reverse primer (5' - 3')</b>   |
|---------------------------------|---------------------------------|-----------------------------------|
| <i>adiponectin</i>              | GCACTGGCAAGTTCTACTGCAA          | GTAGGTGAAGAGAACGGCCTTGT           |
| <i>aP2</i>                      | ACA CCG AGA TTT CCT TCA AAC TG  | CCA TCT AGG GTT ATG ATG CTC TTC A |
| <i>cidea</i>                    | TGC TCT TCT GTA TCG CCC AGT     | GCC GTG TTA AGG AAT CTG CTG       |
| <i>cox4i1</i>                   | ACCAAGCGAATGCTGGACAT            | GGCGGAGAAGCCCTGAA                 |
| <i>cox5b</i>                    | GCTGCATCTGTGAAGAGGACAAC         | CAGCTTGTAAATGGGTTCCACAGT          |
| <i>cox7a1</i>                   | CAG CGT CAT GGT CAG TCT GT      | AGA AAA CCG TGT GGC AGA GA        |
| <i>cox8b</i>                    | GAA CCA TGA AGC CAA CGA CT      | GCG AAG TTC ACA GTG GTT CC        |
| <i>Cre</i>                      | GCG GTC TGG CAG TAA AAA CTA TC  | GTG AAA CAG CAT TGC TGT CAC TT    |
| <i>cyc</i>                      | GCAAGCATAAGACTGGACCAA           | TTGTTGGCATCTGTGTAAGAGAATC         |
| <i>elovl3</i>                   | TCC GCG TTC TCA TGT AGG TCT     | GGA CCT GAT GCA ACC CTA TGA       |
| <i>glut4</i>                    | GTG ACT GGA ACA CTG GTC CTA     | CCA GCC AGT TGC ATT GTA G         |
| <i>MCK</i>                      | GCA AGC ACC CCA AGT TTG A       | ACC TGT GCC GCG CTT CT            |
| <i>MHC (embryonic)</i>          | TCC AAA CCG TCT CTG CAC TGT T   | AGC GTA CAA AGT GTG GGT GTG T     |
| <i>myod</i>                     | CGC CAC TCC GGG ACA TAG         | GAA GTC GTC TGC TGT CTC AAA GG    |
| <i>myg</i>                      | AGC GCA GGC TCA AGA AAG TGA ATG | CTG TAG GCG CTC AAT GTA CTG GAT   |
| <i>myf5</i>                     | CAG CCC CAC CTC CAA CTG         | GGG ACC AGA CAG GGC TGT TA        |
| <i>myf6</i>                     | ATC AGC TAC ATT GAG CGT CTA CA  | CCT GGA ATG ATC CGA AAC ACT TG    |
| <i>otopetrin1</i>               | ACT AGG ACC CCG TCG AAT CT      | ACC ATG CTC TAC GTG CTG TG        |
| <i>PGC-1<math>\alpha</math></i> | CCC TGC CAT TGT TAA GAC C       | TGC TGC TGT TCC TGT TTT C         |
| <i>PGC-1<math>\beta</math></i>  | TCC TGT AAA AGC CCG GAG TAT     | GCT CTG GTA GGG GCA GTG A         |
| <i>PPAR<math>\gamma</math></i>  | GTGCCAGTTTCGATCCGTAGA           | GGCCAGCATCGTGTAGATGA              |
| <i>PRDM16</i>                   | CAG CAC GGT GAA GCC ATT C       | GCG TGC ATC CGC TTG TG            |
| <i>TBP</i>                      | GAA GCT GCG GTA CAA TTC CAG     | CCC CTT GTA CCC TTC ACC AAT       |
| <i>UCP1</i>                     | ACT GCC ACA CCT CCA GTC ATT     | CTT TGC CTC ACT CAG GAT TGG       |
| <i>YFP</i>                      | CACGACTTCTTCAAGTCCGCCATG        | GCGGATCTTGAAGTTCACCTTGAT          |
